# Supplementary material for: Selective Vagus Nerve Stimulation as a Therapeutic Approach for the Treatment of ARDS: A Rationale for Neuro-Immunomodulation in COVID-19 Disease
Source: Frontiers journal article supplement (doi:10.3389/fnins.2021.667036), 2021-04-13
Supplement: Data_Sheet_1.PDF [file Data_Sheet_1.PDF]

**Supplementary Table 1: Parameters of VNS and major outcomes of treatment in clinical studies.**

| <i>Condition/Study</i>                                                                         | <i>Type of VNS device</i>                                                      | <i>Current</i>                                                       | <i>Duty cycle</i>                                                                     | <i>Outcome</i>                                                                                                                                                                                                                 |
|------------------------------------------------------------------------------------------------|--------------------------------------------------------------------------------|----------------------------------------------------------------------|---------------------------------------------------------------------------------------|--------------------------------------------------------------------------------------------------------------------------------------------------------------------------------------------------------------------------------|
| <b>Heart (atrial fibrillation)</b>                                                             |                                                                                |                                                                      |                                                                                       |                                                                                                                                                                                                                                |
| TREAT-AF<br>Paroxysmal AF<br>(Stavrakis et al., 2020)                                          | Auricular VNS: ear clip attached to the tragus                                 | 20 Hz, 1 mA below the discomfort threshold                           | 4.2%: 1 h daily over 6 months                                                         | 6 months: the median AF burden was 85% lower in the active arm (n=26) compared with the control arm (n=27), increase in HRV; TNF- $\alpha$ decreased by 23%.                                                                   |
| <b>Crohn disease</b>                                                                           |                                                                                |                                                                      |                                                                                       |                                                                                                                                                                                                                                |
| <u>NCT01569503</u><br>(Bonaz et al., 2016)                                                     | Left VN: helical cuff Cyberonics electrode (model 302)                         | 1.25 mA, 500 $\mu$ s pulse, 10 Hz                                    | 9%: 30 s on, 300 s off                                                                | 5 out of 9 patients showed full clinical-biological-endoscopic remission; increased HRV; improvement in C-reactive protein values.                                                                                             |
| <u>NCT02311660</u><br>(Bonaz et al., 2016)                                                     | Left VN: helical cuff Cyberonics electrode (model 302)                         | 2 mA, 250 $\mu$ s pulse, 10 Hz                                       | 9%: 30 s on, 300 s off                                                                | At 16 weeks, improvements in endoscopic scores and HRV in 6 out of 8 patients.                                                                                                                                                 |
| <b>Rheumatoid arthritis</b>                                                                    |                                                                                |                                                                      |                                                                                       |                                                                                                                                                                                                                                |
| <u>NCT01552941</u><br>(Koopman et al., 2016)                                                   | Left VN: patients with VNS for epilepsy                                        | 1-2 mA, 500 $\mu$ s pulse, 20 Hz                                     | 0.07-0.28%: 60 s 1-4 times daily                                                      | In 17 RA patients, decreased TNF- $\alpha$ , IL-1 $\beta$ , and IL-6 production and significantly improved clinical signs and symptoms for 84 days.                                                                            |
| <b>Asthma</b>                                                                                  |                                                                                |                                                                      |                                                                                       |                                                                                                                                                                                                                                |
| VNS for acute exacerbation of asthma<br>(Miner et al., 2012)                                   | Percutaneous stimulation of right VN                                           | Median peak stim at 4.4 V (1-11.6 V range), 200 $\mu$ s pulse, 25 Hz | One-off stim for 60 min                                                               | In 25 patients, rapid and progressive improvement of forced expiratory volume and perceived dyspnea.                                                                                                                           |
| <b>Experimental ARDS</b>                                                                       |                                                                                |                                                                      |                                                                                       |                                                                                                                                                                                                                                |
| Venom-induced lung injury: MBT and OA models (Akella and Deshpande, 2015)                      | Bilateral stimulation of transected vagi: efferent fibers only                 | 10 V, 1 ms pulse, 5 Hz                                               | 5 min stim before venom administration, and repeated for 5 min 10 min after injection | Extended survival of MBT model but no effect on OA model.                                                                                                                                                                      |
| Rats, ventilator-induced lung injury (Brégeon et al., 2011)                                    | Bilateral efferent VNS (transected vagi): bipolar platinum electrodes          | 5–10 V, 2 ms pulse, 5–10 Hz                                          | 50%: 10 min on, 10 min off                                                            | Decreased inflammation in alveolar tissue (no lymphocyte infiltration), IL-6 concentration decreased both locally (lung extracts) and systemically (plasma). This was attenuated by alpha7 nicotinic ACh receptor antagonists. |
| Rats and mice, ventilator- and hemorrhagic shock induced lung injury (Dos Santos et al., 2011) | Bilateral stimulation of distal end of transected vagi Bipolar hook electrodes | 1 V, 2 ms pulse, 5 Hz                                                | 20 min total                                                                          | IL-6 values improved.                                                                                                                                                                                                          |

|                                                                                                                            |                                                                          |                       |                                    |                                                                                                     |
|----------------------------------------------------------------------------------------------------------------------------|--------------------------------------------------------------------------|-----------------------|------------------------------------|-----------------------------------------------------------------------------------------------------|
| Two-hit model in rats: sepsis and mechanical damage to the lungs (ventilation at 15 cmH <sub>2</sub> O) (Kox et al., 2012) | Vagi intact, bilateral stimulation of both afferent and efferent fibers. | 5 V, 2 ms pulse, 5 Hz | 3 min total                        | No effect on pulmonary inflammation.                                                                |
| Acid-induced acute lung injury in rabbits (Liu et al., 2017)                                                               | Right vagus nerve (intact – both afferents and efferents)                | 5 V, 2 ms pulse, 1 Hz | 15 min total after acid aspiration | Decreased levels of plasma IL-10 and pulmonary leucocyte infiltration; improved pulmonary function. |

### Supplementary References:

- Akella, A, and Deshpande, SB (2015). Vagal efferent stimulation protects against *Mesobuthus tamulus* venom-induced acute respiratory distress syndrome in rats. *Toxicon* 108, 189-201. doi: 10.1016/j.toxicon.2015.10.013
- Bonaz, B, Sinniger, V, Hoffmann, D, Clarençon, D, Mathieu, N, Dantzer, C, et al. (2016). Chronic vagus nerve stimulation in Crohn's disease: a 6-month follow-up pilot study. *Neurogastroenterology & Motility* 28, 948-953. doi: 10.1111/nmo.12792
- Brégeon, F, Xeridat, F, Andreotti, N, Lepidi, H, Delpierre, S, Roch, A, et al. (2011). Activation of Nicotinic Cholinergic Receptors Prevents Ventilator-Induced Lung Injury in Rats. *PLOS ONE* 6, e22386. doi: 10.1371/journal.pone.0022386
- Dos Santos, CC, Shan, Y, Akram, A, Slutsky, AS, and Haitsma, JJ (2011). Neuroimmune Regulation of Ventilator-induced Lung Injury. *American Journal of Respiratory and Critical Care Medicine* 183, 471-482. doi: 10.1164/rccm.201002-0314OC
- Koopman, FA, Chavan, SS, Miljko, S, Grazio, S, Sokolovic, S, Schuurman, PR, et al. (2016). Vagus nerve stimulation inhibits cytokine production and attenuates disease severity in rheumatoid arthritis. *Proceedings of the National Academy of Sciences* 113, 8284. doi: 10.1073/pnas.1605635113
- Kox, M, Vaneker, M, Van Der Hoeven, JG, Scheffer, G-J, Hoedemaekers, CW, and Pickkers, P (2012). Effects of Vagus Nerve Stimulation and Vagotomy on Systemic and Pulmonary Inflammation in a Two-Hit Model in Rats. *PLOS ONE* 7, e34431. doi: 10.1371/journal.pone.0034431
- Liu, Y, Tao, T, Li, W, and Bo, Y (2017). Regulating autonomic nervous system homeostasis improves pulmonary function in rabbits with acute lung injury. *BMC pulmonary medicine* 17, 98-98. doi: 10.1186/s12890-017-0436-0
- Miner, JR, Lewis, LM, Mosnaim, GS, Varon, J, Theodoro, D, and Hoffmann, TJ (2012). Feasibility of Percutaneous Vagus Nerve Stimulation for the Treatment of Acute Asthma Exacerbations. *Academic Emergency Medicine* 19, 421-429. doi: 10.1111/j.1553-2712.2012.01329.x
- Stavarakis, S, Stoner, JA, Humphrey, MB, Morris, L, Filiberti, A, Reynolds, JC, et al. (2020). TREAT AF (Transcutaneous Electrical Vagus Nerve Stimulation to Suppress Atrial Fibrillation): A Randomized Clinical Trial. *JACC Clin Electrophysiol* 6, 282-291. doi: 10.1016/j.jacep.2019.11.008
